# Supplementary material
Source: PubMed Central journal article supplement (PMC4067638)
Supplement: peds.2013-3775_peds.2013-3775SupplementaryData.pdf [file peds.2013-3775_peds.2013-3775SupplementaryData.pdf]

## Supplemental Information

### SUPPLEMENTAL APPENDIX 1 Round 2 EP Rating Results: Model 1, Group Visit

| Variable                                                                                         | Assessment Relative to Usual Care <sup>a</sup> |                              |                       |                               |                           |
|--------------------------------------------------------------------------------------------------|------------------------------------------------|------------------------------|-----------------------|-------------------------------|---------------------------|
|                                                                                                  | Very Likely<br>Worse (1)                       | Somewhat Likely<br>Worse (2) | About the<br>Same (3) | Somewhat Likely<br>Better (4) | Very Likely<br>Better (5) |
| 1. Receipt of WCC services                                                                       |                                                |                              |                       |                               |                           |
| A. Physical examination                                                                          |                                                |                              | 10                    |                               |                           |
| B. Immunizations                                                                                 |                                                |                              | 6                     | 4                             |                           |
| C. Anticipatory guidance                                                                         |                                                |                              |                       | 5                             | 5                         |
| D. Developmental/behavioral surveillance and screening                                           |                                                |                              | 1                     | 4                             | 5                         |
| E. Psychosocial screening                                                                        |                                                |                              | 1                     | 5                             | 4                         |
| F. Acute care issues that arise during well-child visits                                         |                                                | 2                            | 7                     | 1                             |                           |
| 2. Family-centeredness and timely and appropriate follow-up                                      |                                                |                              |                       |                               |                           |
| A. Is family-centered                                                                            |                                                |                              |                       | 10                            |                           |
| B. Elicits and addresses parent's concerns about behavior and development                        |                                                |                              |                       | 9                             | 1                         |
| C. Elicits and addresses parent's concerns about physical health                                 |                                                | 2                            | 6                     | 2                             |                           |
| D. Provides timely and appropriate follow-up for children with developmental/behavioral problems |                                                |                              | 3                     | 6                             | 1                         |
| E. Provides timely and appropriate follow-up for children with physical health concerns          |                                                | 1                            | 9                     |                               |                           |
| 3. Feasibility and efficiency                                                                    |                                                |                              |                       |                               |                           |
| A. Maximizes parents' satisfaction with care                                                     |                                                |                              |                       | 9                             | 1                         |
| B. Improves overall convenience for parents                                                      | 2                                              | 5                            | 3                     |                               |                           |
| C. Improves visit efficiency (organization perspective)                                          |                                                | 4                            | 2                     | 4                             |                           |
| D. Improves visit efficiency (clinician perspective)                                             |                                                | 2                            | 2                     | 4                             | 2                         |
| E. Accommodates late parents and no-shows                                                        | 3                                              | 4                            | 3                     |                               |                           |
| F. Allows provider time for charting, returning calls, etc                                       |                                                | 1                            | 1                     | 7                             | 1                         |
| G. Is provided in a way that is acceptable to parents                                            |                                                |                              | 1                     | 8                             | 1                         |

<sup>a</sup> Numbers in each row indicate the number of EP members (total of 10) giving the selected score.

**SUPPLEMENTAL APPENDIX 2** Round 2 EP Rating Results: Model 2, Station-to-Station Model

| Variable                                                                                         | Assessment Relative to Usual Care <sup>a</sup> |                           |                    |                            |                        |
|--------------------------------------------------------------------------------------------------|------------------------------------------------|---------------------------|--------------------|----------------------------|------------------------|
|                                                                                                  | Very Likely Worse (1)                          | Somewhat Likely Worse (2) | About the Same (3) | Somewhat Likely Better (4) | Very Likely Better (5) |
| 1. Receipt of WCC services                                                                       |                                                |                           |                    |                            |                        |
| A. Physical examination                                                                          |                                                |                           | 9                  | 1                          |                        |
| B. Immunizations                                                                                 |                                                |                           | 9                  | 1                          |                        |
| C. Anticipatory guidance                                                                         |                                                |                           |                    | 5                          | 5                      |
| D. Developmental/behavioral surveillance and screening                                           |                                                |                           |                    | 8                          | 2                      |
| E. Psychosocial screening                                                                        |                                                |                           |                    | 10                         |                        |
| F. Acute care issues that arise during well-child visits                                         |                                                |                           | 5                  | 5                          |                        |
| 2. Family-centeredness and timely and appropriate follow-up                                      |                                                |                           |                    |                            |                        |
| A. Is family-centered                                                                            |                                                |                           | 2                  | 5                          | 3                      |
| B. Elicits and addresses parent's concerns about behavior and development                        |                                                |                           |                    | 7                          | 3                      |
| C. Elicits and addresses parent's concerns about physical health                                 |                                                |                           | 6                  | 4                          |                        |
| D. Provides timely and appropriate follow-up for children with developmental/behavioral problems |                                                |                           | 2                  | 8                          |                        |
| E. Provides timely and appropriate follow-up for children with physical health concerns          |                                                |                           | 7                  | 3                          |                        |
| 3. Feasibility and efficiency                                                                    |                                                |                           |                    |                            |                        |
| A. Maximizes parents' satisfaction with care                                                     |                                                |                           | 2                  | 8                          |                        |
| B. Improves overall convenience for parents                                                      |                                                | 1                         | 4                  | 5                          |                        |
| C. Improves visit efficiency (organization perspective)                                          |                                                | 3                         | 5                  | 2                          |                        |
| D. Improves visit efficiency (provider perspective)                                              |                                                |                           | 2                  | 8                          |                        |
| E. Accommodates late parents and no-shows                                                        |                                                | 1                         | 4                  | 5                          |                        |
| F. Allows provider time for charting, returning calls, etc                                       |                                                |                           | 3                  | 6                          | 1                      |
| G. Is provided in a way that is acceptable to parents                                            |                                                |                           | 5                  | 5                          |                        |

<sup>a</sup> Numbers in each row indicate the number of EP members (total of 10) giving the selected score.

**SUPPLEMENTAL APPENDIX 3** Round 2 EP Rating Results: Model 3, Mixed One-on-One/Group Visit Model

| Variable                                                                                         | Assessment Relative to Usual Care <sup>a</sup> |                              |                       |                               |                           |
|--------------------------------------------------------------------------------------------------|------------------------------------------------|------------------------------|-----------------------|-------------------------------|---------------------------|
|                                                                                                  | Very Likely<br>Worse (1)                       | Somewhat Likely<br>Worse (2) | About the<br>Same (3) | Somewhat Likely<br>Better (4) | Very Likely<br>Better (5) |
| 1. Receipt of WCC services                                                                       |                                                |                              |                       |                               |                           |
| A. Physical examination                                                                          |                                                |                              | 10                    |                               |                           |
| B. Immunizations                                                                                 |                                                |                              | 10                    |                               |                           |
| C. Anticipatory guidance                                                                         |                                                |                              | 1                     | 9                             |                           |
| D. Developmental/behavioral surveillance and screening                                           |                                                |                              | 2                     | 7                             | 1                         |
| E. Psychosocial screening                                                                        |                                                |                              | 2                     | 8                             |                           |
| F. Acute care issues that arise during well-child visits                                         |                                                |                              | 9                     | 1                             |                           |
| 2. Family-centeredness and timely and appropriate follow-up                                      |                                                |                              |                       |                               |                           |
| A. Is family-centered                                                                            |                                                |                              | 4                     | 6                             |                           |
| B. Elicits and addresses parent's concerns about behavior and development                        |                                                |                              | 3                     | 6                             | 1                         |
| C. Elicits and addresses parent's concerns about physical health                                 |                                                |                              | 9                     | 1                             |                           |
| D. Provides timely and appropriate follow-up for children with developmental/behavioral problems |                                                | 2                            | 6                     | 2                             |                           |
| E. Provides timely and appropriate follow-up for children with physical health concerns          |                                                |                              | 8                     | 2                             |                           |
| 3. Feasibility and efficiency                                                                    |                                                |                              |                       |                               |                           |
| A. Maximizes parents' satisfaction with care                                                     |                                                |                              | 3                     | 7                             |                           |
| B. Improves overall convenience for parents                                                      |                                                | 5                            | 5                     |                               |                           |
| C. Improves visit efficiency (organization perspective)                                          |                                                | 3                            | 6                     | 1                             |                           |
| D. Improves visit efficiency (provider perspective)                                              |                                                |                              | 4                     | 6                             |                           |
| E. Accommodates late parents and no-shows                                                        |                                                |                              | 10                    |                               |                           |
| F. Allows provider time for charting, returning calls, etc                                       |                                                |                              | 9                     | 1                             |                           |
| G. Is provided in a way that is acceptable to parents                                            |                                                | 3                            | 2                     | 5                             |                           |

<sup>a</sup> Numbers in each row indicate the number of EP members (total of 10) giving the selected score.

**SUPPLEMENTAL APPENDIX 4** Round 2 EP Rating Results: Model 4, Technology-Based

| Variable                                                                                         | Assessment Relative to Usual Care <sup>a</sup> |                           |                    |                            |                        |
|--------------------------------------------------------------------------------------------------|------------------------------------------------|---------------------------|--------------------|----------------------------|------------------------|
|                                                                                                  | Very Likely Worse (1)                          | Somewhat Likely Worse (2) | About the Same (3) | Somewhat Likely Better (4) | Very Likely Better (5) |
| 1. Receipt of WCC services                                                                       |                                                |                           |                    |                            |                        |
| A. Physical examination                                                                          |                                                |                           | 10                 |                            |                        |
| B. Immunizations                                                                                 |                                                |                           | 9                  | 1                          |                        |
| C. Anticipatory guidance                                                                         |                                                |                           | 1                  | 6                          | 3                      |
| D. Developmental/behavioral surveillance and screening                                           |                                                |                           |                    | 7                          | 3                      |
| E. Psychosocial screening                                                                        |                                                | 1                         | 1                  | 7                          | 1                      |
| F. Acute care issues that arise during well-child visits                                         |                                                |                           | 10                 |                            |                        |
| 2. Family-centeredness and timely and appropriate follow-up                                      |                                                |                           |                    |                            |                        |
| A. Is family-centered                                                                            |                                                |                           | 2                  | 6                          | 2                      |
| B. Elicits and addresses parent's concerns about behavior and development                        |                                                |                           | 1                  | 6                          | 3                      |
| C. Elicits and addresses parent's concerns about physical health                                 |                                                |                           | 3                  | 7                          |                        |
| D. Provides timely and appropriate follow-up for children with developmental/behavioral problems |                                                |                           | 2                  | 6                          | 2                      |
| E. Provides timely and appropriate follow-up for children with physical health concerns          |                                                |                           | 7                  | 2                          | 1                      |
| 3. Feasibility and efficiency                                                                    |                                                |                           |                    |                            |                        |
| A. Maximizes parents' satisfaction with care                                                     |                                                |                           | 1                  | 7                          | 2                      |
| B. Improves overall convenience for parents                                                      |                                                |                           | 1                  | 4                          | 5                      |
| C. Improves visit efficiency (organization perspective)                                          |                                                | 1                         | 2                  | 5                          | 2                      |
| D. Improve visit efficiency (clinician perspective)                                              |                                                |                           |                    | 6                          | 4                      |
| E. Accommodates late parents and no-shows                                                        |                                                |                           | 5                  | 3                          | 1                      |
| F. Allows provider time for charting, returning calls, etc                                       |                                                |                           | 6                  | 4                          |                        |
| G. Is provided in a way that is acceptable to parents                                            |                                                |                           | 2                  | 8                          |                        |

<sup>a</sup> Numbers in each row indicate the number of EP members (total of 10) giving the selected score.
